# Supplementary material for: Treatment of nausea in pregnancy: a cross-sectional multinational web-based study of pregnant women and new mothers
Source: Springer Nature journal article supplement (doi:10.1186/s12884-015-0746-2), 2015-12-01
Supplement: MOESM1 [file 9743584]

**Additional file 1:** Most common medicines used against nausea on 1<sup>st</sup> and 2<sup>nd</sup> ATC level according to timing of use in pregnancy among women with nausea in pregnancy (n=6701)\*

| <b>Anatomical Therapeutic Chemical (ATC) classification index<br/>1<sup>st</sup> and 2<sup>nd</sup> levels</b> |                                                                  | <b>Anytime during<br/>pregnancy<br/>n (%)</b> | <b>1<sup>st</sup> trimester<br/>n (%)</b> | <b>2<sup>nd</sup> trimester<br/>n (%)</b> | <b>3<sup>rd</sup> trimester<br/>n (%)</b> |
|----------------------------------------------------------------------------------------------------------------|------------------------------------------------------------------|-----------------------------------------------|-------------------------------------------|-------------------------------------------|-------------------------------------------|
| <b>A</b>                                                                                                       | <b>Alimentary tract and metabolism</b>                           | <b>564 (8.4)</b>                              | <b>448 (6.7)</b>                          | <b>249 (3.7)</b>                          | <b>141 (2.1)</b>                          |
| <b>A02</b>                                                                                                     | Drugs for acid related disorders                                 | 176 (2.6)                                     | 105 (1.6)                                 | 83 (1.2)                                  | 78 (1.2)                                  |
| <b>A03</b>                                                                                                     | <i>Drugs for functional gastrointestinal disorders</i>           | 316 (4.7)                                     | 277 (4.1)                                 | 137 (2.0)                                 | 52 (0.8)                                  |
| <b>A04</b>                                                                                                     | Antiemetics and antinauseants                                    | 90 (1.3)                                      | 81 (1.2)                                  | 47 (0.7)                                  | 22 (0.3)                                  |
| <b>A05</b>                                                                                                     | Bile and liver therapy                                           | 12 (0.2)                                      | 9 (0.1)                                   | 6 (0.1)                                   | 1 (0.0)                                   |
| <b>A07</b>                                                                                                     | Antidiarrheals, intestinal antiinflammatory/antiinfective agents | 17 (0.3)                                      | 13 (0.2)                                  | 5 (0.1)                                   | 2 (0.0)                                   |
| <b>N</b>                                                                                                       | <b>Nervous system</b>                                            | <b>115 (1.7)</b>                              | <b>81 (1.2)</b>                           | <b>74 (1.1)</b>                           | <b>34 (0.5)</b>                           |
| <b>N02</b>                                                                                                     | <i>Analgesics</i>                                                | 83 (1.2)                                      | 54 (0.8)                                  | 52 (0.8)                                  | 24 (0.4)                                  |
| <b>N05</b>                                                                                                     | Psycholeptics                                                    | 32 (0.5)                                      | 27 (0.4)                                  | 22 (0.3)                                  | 10 (0.2)                                  |
| <b>R</b>                                                                                                       | <b>Respiratory system</b>                                        | <b>620 (9.3)</b>                              | <b>536 (8.0)</b>                          | <b>319 (4.8)</b>                          | <b>111 (1.7)</b>                          |
| <b>R06</b>                                                                                                     | <i>Antihistamines for systemic use</i>                           | 613 (9.2)                                     | 533 (8.0)                                 | 316 (4.7)                                 | 108 (1.6)                                 |
| <b>-</b>                                                                                                       | <b>Unspecified</b>                                               | 82 (1.2)                                      | 57 (0.9)                                  | 46 (0.7)                                  | 17 (0.3)                                  |
| <b>Total medicine use (any ATC)</b>                                                                            |                                                                  | <b>1201 (17.9)<sup>a</sup></b>                | <b>965 (14.4)</b>                         | <b>577 (8.6)</b>                          | <b>254 (3.8)</b>                          |
| <b>Total vitamin and/or mineral use<br/>(ATC-class: A11-13, B03 and Unspecified supplement)</b>                |                                                                  | <b>106 (1.6)</b>                              | <b>90 (1.3)</b>                           | <b>42 (0.6)</b>                           | <b>9 (0.1)</b>                            |

\*Only medicine groups used by more than 10 women are presented. Exposure timing is defined as follows: 1<sup>st</sup> trimester (gestational weeks 0-12), 2<sup>nd</sup> trimester (gestational week 13-24), 3<sup>rd</sup> trimester (gestational week 25 and up to childbirth).

<sup>a</sup>Numbers do not add up to total due to some women may have used more than one medicine
